# Supplementary material for: Ageing affects DNA methylation drift and transcriptional cell-to-cell variability in mouse muscle stem cells
Source: PubMed Central journal article supplement (PMC6761124; doi:10.1038/s41467-019-12293-4), 2019-09-25
Supplement: 41467_2019_12293_MOESM3_ESM.pdf [file 41467_2019_12293_MOESM3_ESM.pdf]

### **Description of Additional Supplementary Files**

File Name: Supplementary Data 1

Description: Differentially expressed genes between cells from young and old mice.

File Name: Supplementary Data 2

Description: Top 1000 most variable genes across the entire data set.

File Name: Supplementary Data 3

Description: Top 200 genes correlated and anticorrelated with the similarity score to the young reference transcriptome.

File Name: Supplementary Data 4

Description: Increase of transcriptional and methylation heterogeneity with age in promoter regions ( $\Delta$  : Old-young).
